# Supplementary material for: Prognostic value of 11C-methionine volume-based PET parameters in IDH wild type glioblastoma
Source: PubMed Central journal article supplement (PMC8880430; doi:10.1371/journal.pone.0264387), 2022-02-25
Supplement: pone.0264387.s001.pdf [file pone.0264387.s001.pdf]

# Supplement 1

## S1a – Paired analysis between MTV and clinical parameters

MTV and age

| Variables in the Equation |       |      |       |    |      |        | 95,0% CI for Exp(B) |       |
|---------------------------|-------|------|-------|----|------|--------|---------------------|-------|
|                           | B     | SE   | Wald  | df | Sig. | Exp(B) | Lower               | Upper |
| MTV                       | ,143  | ,056 | 6,536 | 1  | ,011 | 1,153  | 1,034               | 1,287 |
| Age                       | -,076 | ,054 | 1,987 | 1  | ,159 | ,927   | ,834                | 1,030 |

MTV and extent of resection (EOR)

| Variables in the Equation |      |      |       |    |      |        | 95,0% CI for Exp(B) |       |
|---------------------------|------|------|-------|----|------|--------|---------------------|-------|
|                           | B    | SE   | Wald  | df | Sig. | Exp(B) | Lower               | Upper |
| MTV                       | ,120 | ,048 | 6,230 | 1  | ,013 | 1,128  | 1,026               | 1,240 |
| EOR                       | ,264 | ,567 | ,216  | 1  | ,642 | 1,302  | ,428                | 3,958 |

MTV and radiotherapy dose

| Variables in the Equation |      |      |       |    |      |        | 95,0% CI for Exp(B) |       |
|---------------------------|------|------|-------|----|------|--------|---------------------|-------|
|                           | B    | SE   | Wald  | df | Sig. | Exp(B) | Lower               | Upper |
| MTV                       | ,172 | ,065 | 7,035 | 1  | ,008 | 1,187  | 1,046               | 1,348 |
| RTdose                    | ,032 | ,026 | 1,533 | 1  | ,216 | 1,033  | ,981                | 1,087 |

## S1b – Paired analysis between TLMM and clinical parameters

TLMM and age

| Variables in the Equation |       |      |       |    |      |        | 95,0% CI for Exp(B) |       |
|---------------------------|-------|------|-------|----|------|--------|---------------------|-------|
|                           | B     | SE   | Wald  | df | Sig. | Exp(B) | Lower               | Upper |
| TLMM                      | ,025  | ,011 | 4,989 | 1  | ,026 | 1,025  | 1,003               | 1,047 |
| Age                       | -,083 | ,049 | 2,895 | 1  | ,089 | ,921   | ,837                | 1,013 |

TLMM and extent of resection (EOR)

| Variables in the Equation |      |      |       |    |      |        | 95,0% CI for Exp(B) |       |
|---------------------------|------|------|-------|----|------|--------|---------------------|-------|
|                           | B    | SE   | Wald  | df | Sig. | Exp(B) | Lower               | Upper |
| TLMM                      | ,020 | ,010 | 3,908 | 1  | ,048 | 1,020  | 1,000               | 1,041 |
| EOR                       | ,554 | ,548 | 1,020 | 1  | ,312 | 1,740  | ,594                | 5,098 |

TLMM and radiotherapy dose

| Variables in the Equation |       |      |       |    |      |        | 95,0% CI for Exp(B) |       |
|---------------------------|-------|------|-------|----|------|--------|---------------------|-------|
|                           | B     | SE   | Wald  | df | Sig. | Exp(B) | Lower               | Upper |
| TLMM                      | ,021  | ,011 | 3,830 | 1  | ,050 | 1,021  | 1,000               | 1,043 |
| RTdose                    | -,005 | ,023 | ,048  | 1  | ,826 | ,995   | ,950                | 1,042 |
