# Supplementary material for: Prognostic value of 11C-methionine volume-based PET parameters in IDH wild type glioblastoma
Source: PubMed Central journal article supplement (PMC8880430; doi:10.1371/journal.pone.0264387), 2022-02-25
Supplement: pone.0264387.s002.pdf [file pone.0264387.s002.pdf]

## Supplement 2

### S2a – Kaplan Meier curve for influence of age on survival

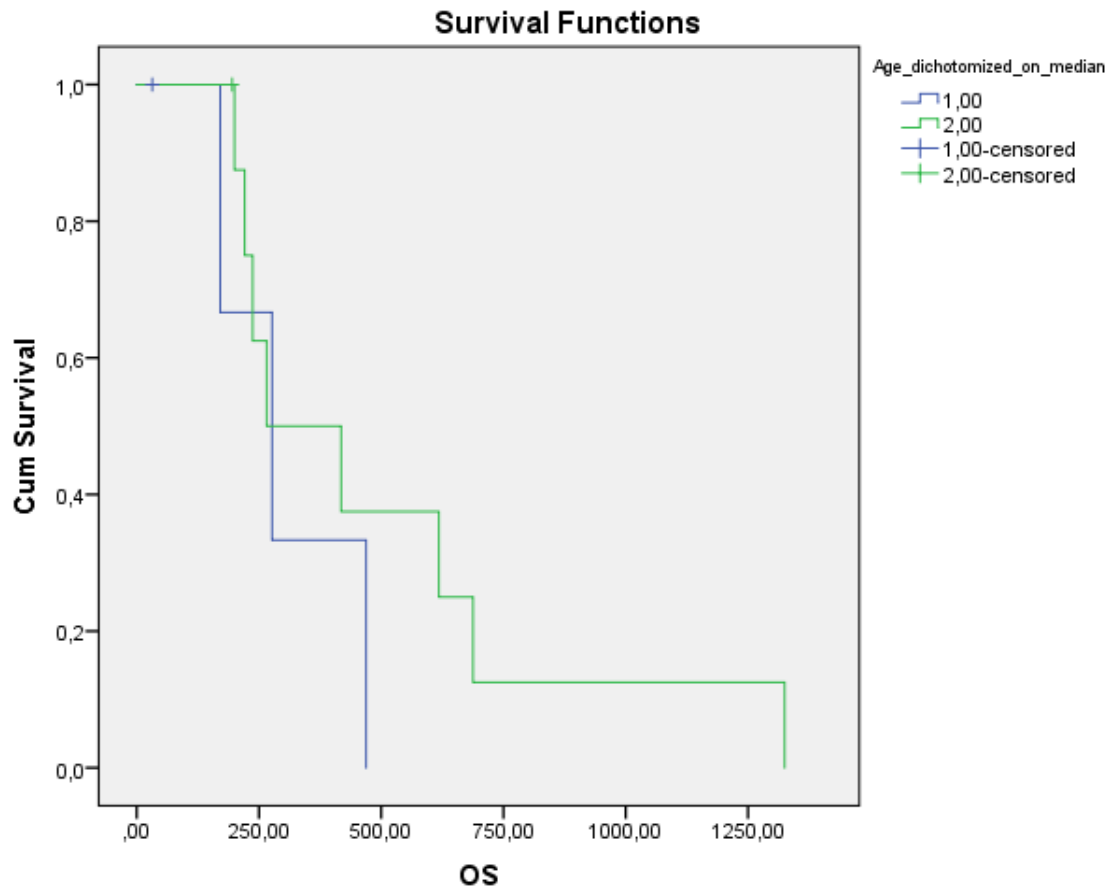

Data were dichotomized on median age of 57 years

## S2b – Kaplan Meier curve for influence of age on survival

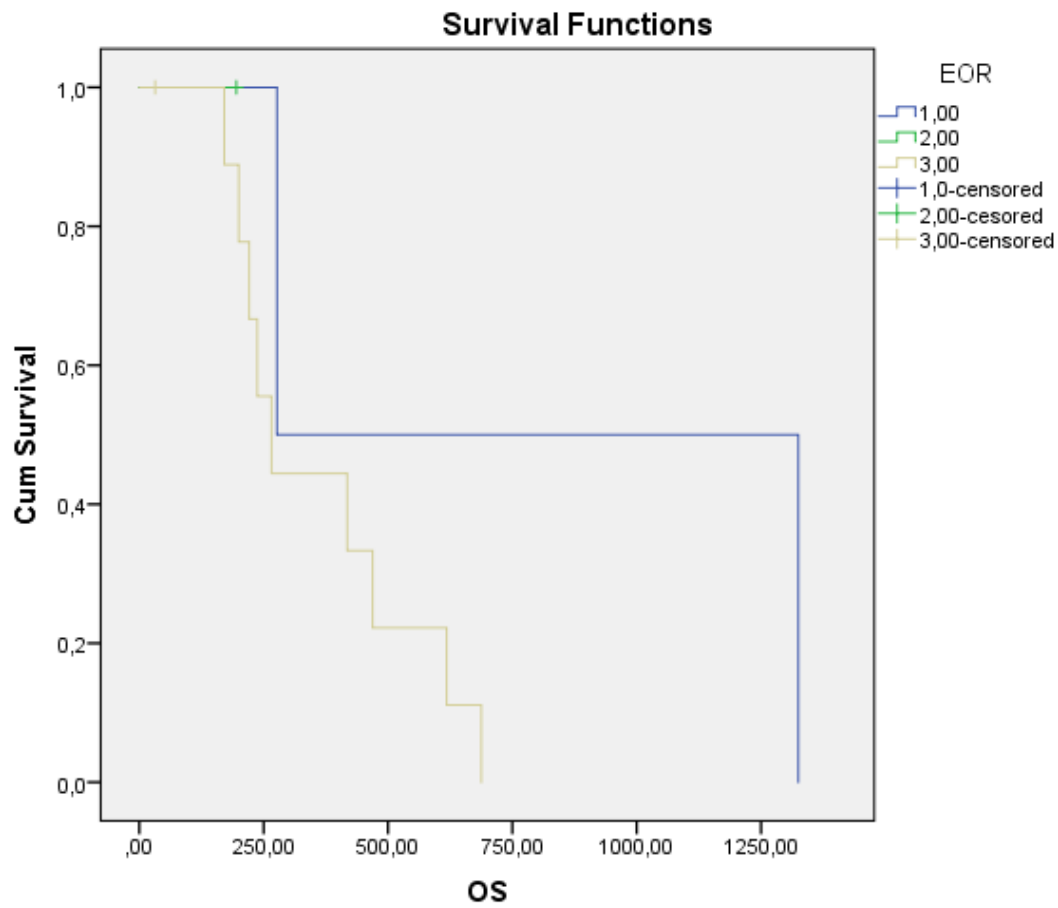

1 = biopsy; 2 = subtotal resection; 3 = gross-total resection
